# Supplementary material
Source: publisher figshare collection journal article supplement (https://acs.figshare.com/ndownloader/files/5155435)
Supplement: Supplementary file 1 [file 5155435]

# One-Pot Synthesis of High-Quality Zinc-Blende CdS Nanocrystals

Y. Charles Cao\*, and Jianhui Wang

*Department of Chemistry, University of Florida, Gainesville, FL 32611*

## Measurement of the number of stable nuclei in the synthesis of CdS nanocrystals

In the nanocrystal nucleation stage, two types of nuclei are often formed: (a) unstable nuclei and (b) stable nuclei. While unstable nuclei will dissolve with particle growth, the stable ones will grow to form nanocrystals. Therefore, the number of stable nuclei ( $N_{sn}$ ) is equal to the number of nanocrystals ( $N_n$ ) in the growth stage, and so the concentration of stable nuclei ( $C_{sn}$ ) is equal to the concentration of nanocrystals ( $C_n$ ). In other words, the concentration of stable nuclei can be obtained by measuring the concentration of nanocrystals in the growth stage.

$$N_{sn} = N_n \quad (1)$$

$$C_{sn} = C_n \quad (2)$$

Finally, we can obtain the number of stable nuclei by Eq. 3.

$$N_{sn} = C_{sn} * V_0 = C_n * V_0 \quad (3)$$

Where,  $V_0$  is the volume of solution during the nucleation stage

In this paper, UV-Vis spectrometry is used to measure the concentration of nanocrystals in the synthesis (Eq. 4).

$$C_n = A/(\epsilon * l) \quad (4)$$

Where,  $\epsilon$  is the absorption coefficient at the first absorption peak of the nanocrystals,  $l$  is pathlength, and  $A$  is absorbance.

$$C_{n1}/C_{n2} = [(A_1/(\epsilon_1 * l))/[(A_2/(\epsilon_2 * l)]] \quad (5)$$

$$C_{n1}/C_{n2} = A_1/A_2 \quad (6)$$

$$N_{sn1}/N_{sn2} = A_1/A_2 \quad (7)$$

The absorption coefficient ( $\epsilon$ ) depends on the size of the nanocrystals, and same-sized CdS particles have a nearly identical absorption coefficient regardless of their surface passivation.<sup>1</sup> Therefore, when measuring same-sized particles in different reactions, Eq. 5 becomes Eq. 6. Then the combination of Eqs. 6 and 3 yields Eq. 7. So, the ratio between the numbers of stable nuclei in two different reactions equals that of the optical density of the aliquots. In other words, Eq. 7 allows the comparison among the numbers of nuclei in different reactions without knowing the absorption coefficients of the nanocrystals.

Six syntheses were carried out to check the effect of  $I_2$  on the number of stable nuclei. The amount of chemicals except  $I_2$  was kept the same as in the typical experiment (main text). The ratios of S:  $I_2$  were 1:1/32, 1:1/16, 1:1/8, 1:1/4, 1:3/8, and 1:1/2. In each synthesis at least three different-sized particles were chosen to evaluate the number of stable nuclei. Then, the number of stable nuclei was normalized with that found in the synthesis when the ratio of S: $I_2$  was 1:1/32. The relative number of nuclei as a function of the ratio of S:  $I_2$  is shown in Figure 2A in main text (solid boxes). In addition, three syntheses were carried out to check the effect of  $I_1$  on the number

of stable nuclei. The relative number of nuclei as a function of the ratio of S:I<sub>1</sub> is shown in Supporting Figure 1 (solid boxes).

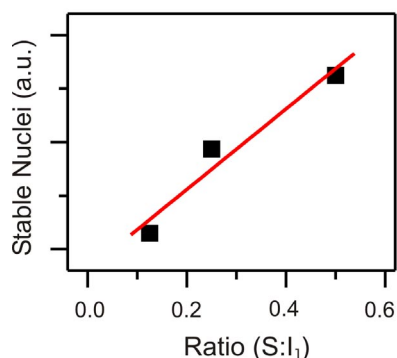

**Supporting Figure 1.** The number of stable nuclei in the synthesis with different S:I<sub>1</sub> ratios. The number of stable nuclei increases with the amount of initiator I<sub>1</sub>.

#### **Sample preparation for X-ray diffraction (XRD).**

Powder X-ray diffraction patterns were measured on a Philips APD 3720 X-ray diffractometer with Cu K $\alpha$  radiation. Approximately 8 mg of CdS nanocrystals were dispersed in a minimum volume of toluene. The nanocrystal solution was deposited onto low-scattering quartz plates, and the solvent was evaporated under mild vacuum.

#### **Reference:**

1. Yu, W. W.; Qu, L.; Guo, W.; Peng, X. *Chem. Mater.* **2003**, *15*, 2854.
